# Supplementary material for: School-Based Tobacco Control and Smoking in Adolescents: Evidence from Multilevel Analyses
Source: MDPI journal article supplement (doi:10.3390/ijerph17103422), 2020-05-14
Supplement: s1 [file s1]

## Supplementary Materials

**Table S1.** Types of school-based tobacco control activities.

| no. | School-based tobacco control activities                                                                    |
|-----|------------------------------------------------------------------------------------------------------------|
| 1   | Handouts related to smoking prevention                                                                     |
| 2   | Lectures and counseling by teachers                                                                        |
| 3   | Audiovisual education pertaining to smoking prevention and cessation, and the plan of the tobacco industry |
| 4   | Discussion regarding the harmful effects of tobacco products and the plan of the tobacco industry          |
| 5   | Field work such as art contests and quizzes related to smoking prevention                                  |
| 6   | Attendance of plays and musicals with a theme of smoking prevention and cessation                          |
| 7   | Peer counseling and mentoring activities                                                                   |
| 8   | Smoking prevention “camp” with family and a teacher                                                        |
| 9   | Anti-smoking campaigns, including a ban on tobacco sales to minors in the area around the school           |
| 10  | Establish school tobacco control policies, and implement the tobacco-free school policy                    |
| 11  | Others                                                                                                     |

**Table S2.** Exploratory factor analysis of attitudes to tobacco use.

| No. | Attitudes to tobacco use                                                 | Factor 1 | Factor 2 |                                                 |
|-----|--------------------------------------------------------------------------|----------|----------|-------------------------------------------------|
| 1   | Tobacco is said to be harmful, but in fact it is not that harmful        | 0.64*    | 0.06     | Attitudes toward tobacco use                    |
| 2   | I think it is fine to smoke one or two times out of curiosity            | 0.68*    | 0.07     |                                                 |
| 3   | I feel I want to smoke when I see a smoking scene in movies or magazines | 0.81*    | 0.08     |                                                 |
| 4   | It looks mature when people smoke                                        | 0.92*    | 0.07     |                                                 |
| 5   | It looks cool when a friend smokes                                       | 0.90*    | 0.08     |                                                 |
| 6   | I intend to smoke in the future                                          | 0.62*    | 0.05     |                                                 |
| 7   | Smoking in public places where many people gather should be prohibited   | 0.07     | 0.81*    | Attitudes regarding tobacco control regulations |
| 8   | Adolescent smoking should be prohibited by law or regulation             | 0.09     | 0.88*    |                                                 |
| 9   | Education aimed at smoking prevention should begin in elementary school  | 0.06     | 0.79*    |                                                 |
